# Supplementary material
Source: PubMed Central journal article supplement (PMC3706842)
Supplement: supp_me.2013-1093_Binder1.pdf [file supp_me.2013-1093_Binder1.pdf]

Data Supplement 1

**Table X - Statistical Analysis Data -Comparing Gilbert et al., and current paper**

|                                                                                                                                                | Christenson et al. mGC                             | Gilbert et al. 22h vs -2h |                               |
|------------------------------------------------------------------------------------------------------------------------------------------------|----------------------------------------------------|---------------------------|-------------------------------|
| total number of transcripts in array                                                                                                           | 24128                                              | 25200                     |                               |
| number of expressed transcripts (mGC filter Affy Probes & Probes not present in all 18 samples BHPV<0.01  FC >1.5) (Gilbert: pv<0.05  FC >1.5) | 2417                                               | 689                       |                               |
| number of transcripts with mapped gene symbols                                                                                                 | 13981                                              | 14403                     | IPA mapping ; HOMOLOG GENE ID |
| number of unique gene symbols                                                                                                                  | 10221                                              | 11452                     | IPA mapping ; HOMOLOG GENE ID |
| number of unique gene symbols in both Gilbert et. al. 0 & 1 and Christenson et. al.                                                            | <b>8389</b>                                        |                           |                               |
| number of significantly LH-regulated unique genes                                                                                              | 1532                                               | 443                       | IPA mapping ; HOMOLOG GENE ID |
| number of common significantly LH-regulated unique genes (Christenson :BHPV<0.01  FC >1.5 ;Gilbert: pv<0.05  FC >1.5)                          | 1418                                               | 328                       |                               |
|                                                                                                                                                |                                                    |                           |                               |
| number of common genes significant in both studies                                                                                             | <b>121</b>                                         |                           |                               |
| <b>significance of this observation (Fisher's exact test p-value)</b>                                                                          | 5.40E-19 <b>very significant</b>                   |                           |                               |
|                                                                                                                                                |                                                    |                           |                               |
| <b>All common genes:</b>                                                                                                                       |                                                    |                           |                               |
| Pearson -> 0.012962 (0.23521)                                                                                                                  | no correlation in gene expression                  |                           |                               |
| Spearman -> 0.29489 (6.1375e-168)                                                                                                              | no correlation in rank of gene expression          |                           |                               |
|                                                                                                                                                |                                                    |                           |                               |
| <b>Significant common genes:</b>                                                                                                               |                                                    |                           |                               |
| Pearson -> 0.47293 (4.3137e-008)                                                                                                               | moderate correlation in gene expression            |                           |                               |
| Spearman -> 0.64131 (2.2947e-015)                                                                                                              | significant correlation in rank of gene expression |                           |                               |

Table Y - Comparison of marker gene expression (Fold-changes and significance) between this paper and Gilbert et al., 2011.

| Gene Symbol | Christenson et. al. |                                     |             |             | Gilbert et. al. |             |             |
|-------------|---------------------|-------------------------------------|-------------|-------------|-----------------|-------------|-------------|
|             | p-value             | Benjamini-Hochberg adjusted p-value | Fold-Change | Significant | p-value         | Fold-Change | Significant |
| ADAMTS1     | 7.85E-05            | 1.39E-03                            | 4.587       | Yes         | 2.63E-01        | 1.358       | No          |
| CCND2       | 1.01E-09            | 8.69E-07                            | -27.334     | Yes         | 9.89E-03        | -1.833      | Yes         |
| CYP11A1     | 3.29E-02            | 1.21E-01                            | -9.991      | No          | 2.55E-01        | -1.333      | No          |
| CYP19A1     | 3.07E-06            | 1.34E-04                            | -18.554     | Yes         | 5.17E-01        | -1.241      | No          |
| FSHR        | 1.30E-03            | 1.16E-02                            | -3.909      | No          | 5.75E-01        | 1.169       | No          |
| LHCGR       | 4.38E-06            | 1.68E-04                            | -16.782     | Yes         | 9.98E-02        | -1.390      | No          |
| NR5A1       | 2.25E-02            | 9.27E-02                            | -1.578      | No          | 8.77E-01        | -1.051      | No          |
| NR5A2       | 4.11E-01            | 6.24E-01                            | -1.597      | No          | 6.30E-01        | 1.111       | No          |
| PCNA        | 3.46E-05            | 7.41E-04                            | -2.690      | Yes         | 6.30E-02        | -1.522      | No          |
| PTGS2       | 4.50E-06            | 1.70E-04                            | 48.708      | Yes         | 8.73E-01        | 1.030       | No          |
| PTX3        | 1.35E-12            | 2.02E-08                            | 711.362     | Yes         | 4.61E-01        | 1.216       | No          |
| STAR        | 5.60E-04            | 6.07E-03                            | 2.098       | Yes         | 4.45E-03        | -2.594      | Yes         |
| TIMP1       | 8.81E-08            | 1.36E-05                            | 38.276      | Yes         | 2.24E-02        | 2.309       | Yes         |
| HSD3B1      | 2.75E-01            | 4.93E-01                            | -2.182      | No          | 6.21E-01        | -1.157      | No          |

The list of 14 cell marker transcripts present in both studies

### Significance criteria for differential expression

Christenson et. al; Absolute fold change  $\geq 1.5$  and Benjamini-Hochberg adjusted p-value  $\leq 0.01$ .

Gilbert et. al. : Absolute fold change  $\geq 1.5$  and p-value  $\leq 0.05$

Supplementary Table 1: Primers used for cDNA synthesis and qPCR

| Gene           |     | Sequence                                                 | Accession nos. |
|----------------|-----|----------------------------------------------------------|----------------|
| <i>GAPDH</i>   | rt  | CAGTCTTCTGGGTGGCAGTGATG                                  | NM_001034034   |
|                | rev | GCAGGAGGCATTGCTGACAATCT                                  |                |
| <i>STAR</i>    | for | AGCGAGATCCTGCCAACATCAAG                                  | NM_174189      |
|                | rt  | GTTGGCCTTCAACACCTAGCTTC                                  |                |
| <i>CYP11A1</i> | rev | CTGCGAGAGGACCTGGTTGATG                                   | NM_176644      |
|                | for | TTGTGAGCGTACGCTGTACCAAG                                  |                |
| <i>HSD3B1</i>  | rt  | AGGGACACTGGTGTGGAACATC                                   | NM_174343      |
|                | rev | GGTCTTTCTTCCAGGTTCTGAC                                   |                |
| <i>CYP17A1</i> | for | AGAGAATCCACTTTCCGCCACATC                                 | NM_174304      |
|                | rt  | TCAGGGCACAAGTGTACAAGGTG                                  |                |
| <i>CYP19A1</i> | rev | GCATTCCTGACGTCAATGACAGAG                                 | NM_174305      |
|                | for | TGTTGGTGGAGGAGAAGGATCTG                                  |                |
| <i>FSHR</i>    | rt  | AGAGAGAGAGGCTCGGACAGATC                                  | NM_174061      |
|                | rev | TTCAGGTTGCCATCCTTGAACAG                                  |                |
| <i>LHCGR</i>   | for | TGATGATTGGACACCACCAGTTG                                  | NM_174381      |
|                | rt  | GAGCATGTTAGAGGTGTCCAGCA                                  |                |
| <i>PCNA</i>    | rev | ATGCCGATGAACTGCAACCCAAGTT                                | NM_001034494   |
|                | for | GGATCGGCAGTGCCTGCAATTAATA                                |                |
| <i>PTGS2</i>   | rt  | GGGAAGGTTCTGGAAGGCATCAGG                                 | NM_174445      |
|                | rev | TCTGGAAGGCATCAGGGTCGATGTA                                |                |
| <i>NR5A1</i>   | for | TCACCAAGCTTCGAGTCATCCCAA                                 | NM_174403      |
|                | rt  | GGAAGGCGTCGTTGTGCATCTTCT                                 |                |
| <i>NR5A2</i>   | rev | GGGAAATCAGCGTTGTCCCATTGA                                 | XM_615597      |
|                | for | GCATCCACAAGCTTCCAGATGTTACGA                              |                |
| <i>CCND2</i>   | rt  | GAAACCTTTTCTGATTTGGAGCTT                                 | NM_001076372   |
|                | rev | CGTGTCCGCGTTATCTTCAGCTCTT                                |                |
| <i>PTX3</i>    | for | GTGAACCTGCAGAGCATGGACTCGT                                | NM_001076259   |
|                | rt  | ATGTCTCCATAGAGCGCTTCTAAC                                 |                |
| <i>TIMP1</i>   | rev | CTGGTCAATTGAAGCCTTTGATAC                                 | NM_174471      |
|                | for | TACAGCACTTGAGTGGCTATCAC                                  |                |
| <i>ADAMTS1</i> | rt  | TCACCAGGCTGTGGTTGTTTCAGGA                                | NM_001101080   |
|                | rev | GTCAGCTCCACCTCCTGCCCTGT                                  |                |
| <i>ADAMTS1</i> | for | ACGCAGGTGCATGGTCTTCAAGGA                                 | NM_001101080   |
|                | rt  | CCCTCCACCAGCTGGAAGTTCTCC                                 |                |
| <i>ADAMTS1</i> | rev | GATGGAGCCCTCCTTTCCGTGAAC                                 | NM_001101080   |
|                | for | ATGTGCAAGATGGCAGACCAGACG                                 |                |
| <i>ADAMTS1</i> | rt  | CGCCAGGAACATGCACACGGCCCCC                                | NM_001101080   |
|                | rev | CACGGCCCCCAGCAGCTGCAGATGG                                |                |
| <i>ADAMTS1</i> | for | CGCAGGGCCGTGCCGGACGCCAAC                                 | NM_001101080   |
|                | rt  | random p(dN) <sub>6</sub> + oligo-dT p(dT) <sub>15</sub> |                |
| <i>ADAMTS1</i> | rev | TGCAGGCTTCCCTCCAGCCGGCCCA                                | NM_001101080   |
|                | for | CCCACTGAGGACCCACGCCGTGCGAC                               |                |
| <i>ADAMTS1</i> | rt  | random p(dN) <sub>6</sub> + oligo-dT p(dT) <sub>15</sub> | NM_001101080   |
|                | rev | AGGCTCGGCTGGGGGCTGTGAGCCA                                |                |
| <i>ADAMTS1</i> | for | CGCAGCTCAGGCCCTGCCGCCATCG                                | NM_001101080   |
|                | rt  | random p(dN) <sub>6</sub> + oligo-dT p(dT) <sub>15</sub> |                |
| <i>ADAMTS1</i> | rev | CCGGCCGCCACGGAGAACAAGGTCAG                               | NM_001101080   |
|                | for | CACTGTGCAGTGGGCGCCGCGGGA                                 |                |

for, forward primer; rev, reverse primer; rt, primer used for cDNA synthesis

Supplementary Table 2. Morphological and physiological data of analyzed follicles.

|            | n <sup>a</sup> | Diameter <sup>b</sup> [mm] | P4 <sup>c</sup> [ng/ml] | E2 <sup>d</sup> [ng/ml] | E2/P4 <sup>e</sup> |
|------------|----------------|----------------------------|-------------------------|-------------------------|--------------------|
| before LH  | 3              | 13.8 (1.2)                 | 21.1 (5.1)              | 89.3 (6.7)              | 4.9 (1.5)          |
| after LH   | 3              | 20.5 (0.9)                 | 212.7 (113.7)           | 81.2 (1.0)              | 0.6 (0.2)          |
| p (t-test) |                | 0.010                      | 0.168                   | 0.292                   | 0.049              |

<sup>a</sup> numbers of follicles; <sup>b</sup> mean diameters of follicles; <sup>c</sup> mean antral progesterone (P4) and <sup>d</sup> estrogen (E2) concentrations, and <sup>e</sup> mean E2/P4 ratios; standard errors of means are shown in brackets; LH, luteinizing hormone surge; p values were calculated according to t-test analysis.
